# Supplementary material
Source: publisher figshare collection journal article supplement (https://aacr.figshare.com/articles/dataset/_/23668549)
Supplement: Supplementary file 1 [file 41536732]

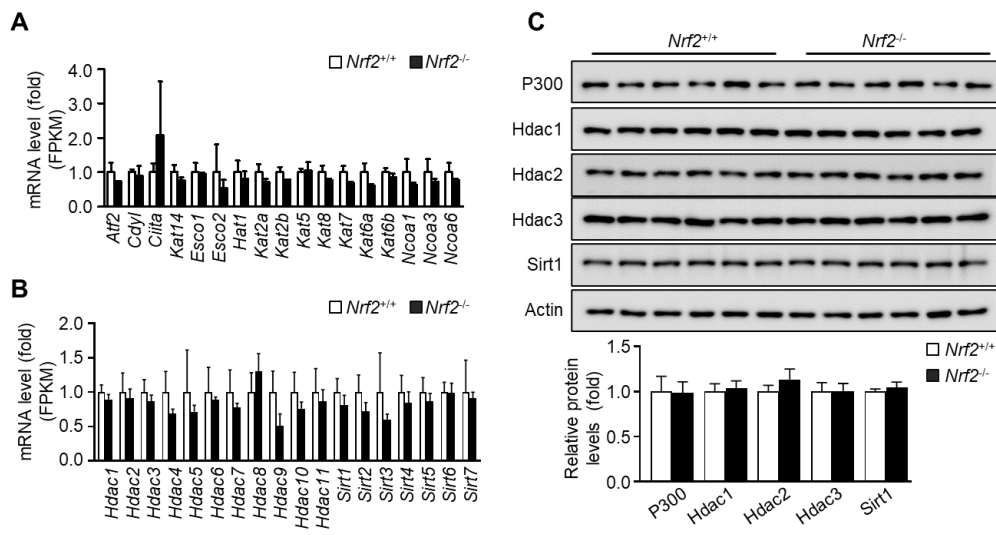

**Fig S3. Nrf2 ablation has no effect on the expression of histone acetylation modifiers.** The expression signature (FPKM) of the core genes for histone acetylation (**A**) and deacetylation (**B**) and immunoblot of their protein levels (**C**) in *Nrf2*<sup>+/+</sup> and *Nrf2*<sup>-/-</sup> mouse liver tumors (n=3 for FPKM, n=6 for RT-PCR and immunoblot). Mouse 18s rRNA gene was used as an internal reference.
